# Supplementary material for: Clinicopathologic implications of the miR-197/PD-L1 axis in oral squamous cell carcinoma
Source: PubMed Central journal article supplement (PMC5630402; doi:10.18632/oncotarget.19842), 2017-08-03
Supplement: oncotarget-08-66178-s001.pdf [file oncotarget-08-66178-s001.pdf]

## **Clinicopathologic implications of the miR-197/PD-L1 axis in oral squamous cell carcinoma**

### **SUPPLEMENTARY MATERIALS**

**Supplementary Table 1: Clinicopathologic features of oral squamous cell carcinoma according to miR-197 expression level (n=68).**

**See Supplementary File 1**

**Supplementary Table 2: Clinicopathologic features of oral squamous cell carcinoma according to tumor expression of PD-L1 (n=68).**

**See Supplementary File 2**
